# Supplementary material
Source: publisher figshare collection journal article supplement (https://acs.figshare.com/ndownloader/files/3829231)

## Supporting Information

# An optimized process for separating NaOH from sodium aluminate solution: coupling of electrodialysis and electro-electrodialysis

Haiyang Yan<sup>1</sup>, Cuiming Wu<sup>1,\*</sup>, Yonghui Wu<sup>2,\*\*</sup>

<sup>1</sup>*Anhui Key Lab of Controllable Chemical Reaction & Material Chemical Engineering, School of Chemistry and Chemical Engineering, Hefei University of Technology, Hefei 230009, P.R. China;*

<sup>2</sup>*Department of Chemistry, Yancheng Teachers University, Yancheng 224002, P.R. China;*

\*Corresponding author

Tel.: +86-551-290-1458. E-mail address: [cmwu@ustc.edu.cn](mailto:cmwu@ustc.edu.cn). (C. M. Wu)

Tel.: +86-515-88233188. E-mail address: [wuyonghui1000@126.com](mailto:wuyonghui1000@126.com). (Y. H. Wu)

The supporting information provides additional detail as following:

(1) **Figure S1.**The digital photo of ED setup with geometric characteristics in detail.

Number of pages: 2

Number of figures: 1

**Figure S1.** The digital photo of ED setup with geometric characteristics in detail.

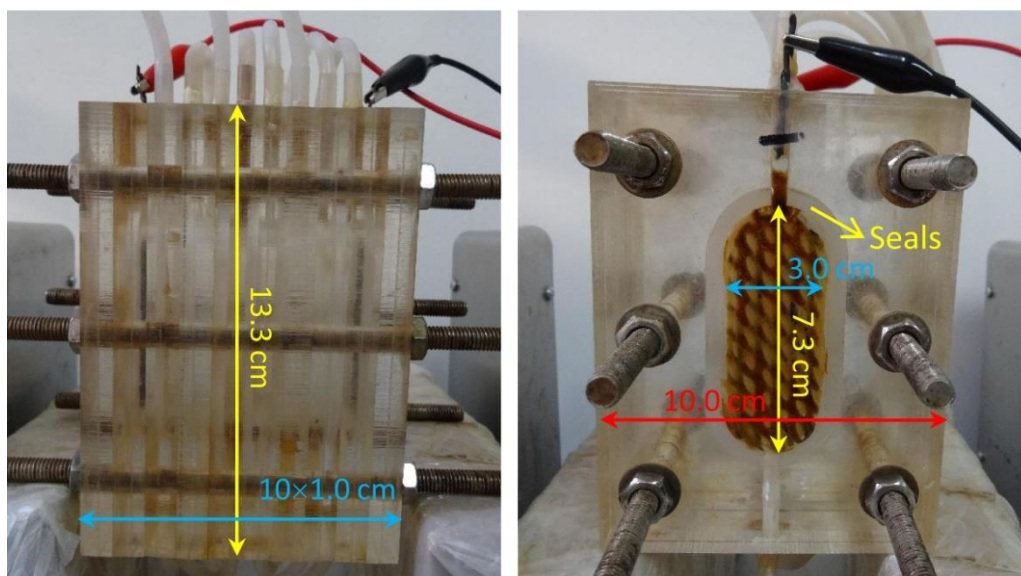

Supplement: Supplementary file 1 [file 3829231]
